# Supplementary material for: Time- and compartment-resolved proteome profiling of the extracellular niche in lung injury and repair
Source: PubMed Central journal article supplement (PMC4547847; doi:10.15252/msb.20156123), 2015-07-14
Supplement: msb0011-0819-sd1.pdf [file msb0011-0819-sd1.pdf]

## Expanded View Figures

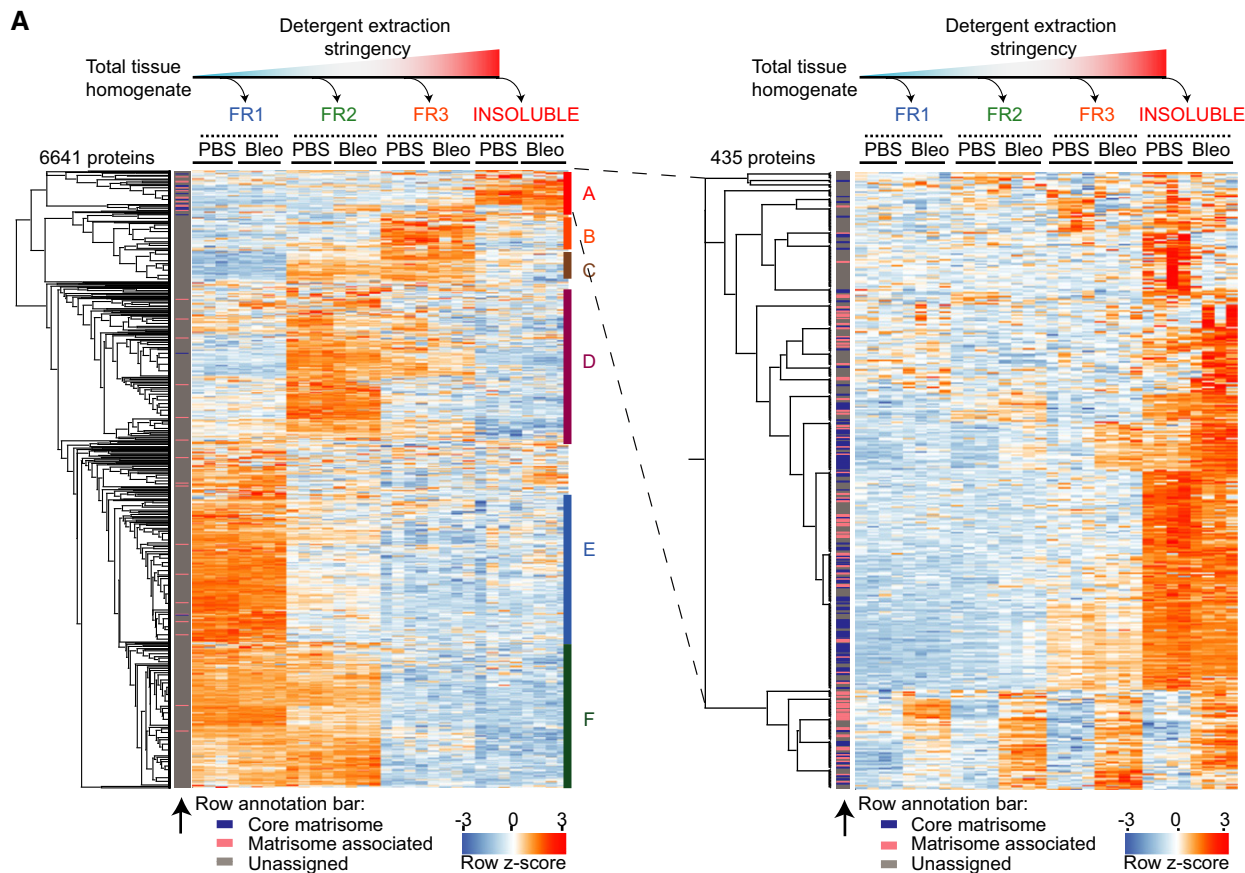

**B**

| Cluster A                     | Cluster B                    | Cluster C               | Cluster D                 | Cluster E                    | Cluster F                          |
|-------------------------------|------------------------------|-------------------------|---------------------------|------------------------------|------------------------------------|
| Core matrisome                | Cytoskeleton                 | Nucleus                 | Nucleus                   | cytoplasmic part             | cytoplasm                          |
| Secreted                      | Coiledcoil                   | Chromosome              | Transcription             | Acetylation                  | Transmembranehelix                 |
| ECM Glycoproteins             | Celljunction                 | Ribosomebiogenesis      | Transcriptionregulation   | Proteasome                   | Transmembrane                      |
| Extracellularmatrix           | Actin-binding                | Nucleosomecore          | Chromatinregulator        | Oxidoreductase               | integral to membrane               |
| Signal                        | Cilium                       | rRNAprocessing          | DNA-binding               | Ligase                       | Membrane                           |
| Disulfidebond                 | Motorprotein                 | DNA-binding             | Zinc-finger               | Directproteinsequencing      | membrane part                      |
| Matrisome-associated          | Cellprojection               | Phosphoprotein          | Repressor                 | Hydrolase                    | intrinsic to membrane              |
| Glycoprotein                  | Dynein                       | mRNAtransport           | mRNAprocessing            | Transferase                  | Mitochondrion                      |
| ECM Regulators                | Myosin                       | mRNAsplicing            | Zinc                      | Magnesium                    | mitochondrial part                 |
| Collagens                     | Alternativesplicing          | Citrullination          | Activator                 | NADP                         | organelle membrane                 |
| Collagen                      | Tightjunction                | Ublconjugation          | mRNAsplicing              | NAD                          | Endoplasmicreticulum               |
| Basementmembrane              | Actincapping                 | Repeat                  | Spliceosome               | Aminoacyl-tRNAsynthetase     | endoplasmic reticulum part         |
| Celladhesion                  | Microtubule                  | RNA-binding             | DNA-directedRNApolymerase | Threonineprotease            | Ribosomalprotein                   |
| EGF-like domain               | Flagellum                    | Actin-binding           | Phosphoprotein            | Lyase                        | Mitochondrioninnermembrane         |
| Hydroxylation                 | Ciliumbiogenesis/degradation | mRNAprocessing          | Transmembrane             | 3D-structure                 | Transitpeptide                     |
| Repeat                        | Calmodulin-binding           | GPI-anchor              | Transmembranehelix        | Allostericenzyme             | Transport                          |
| Proteaseinhibitor             | Repeat                       | Actincapping            | Chromosome                | Multifunctionalenzyme        | structural constituent of ribosome |
| Secreted Factors              | LIMdomain                    | Isopeptidebond          | Cellmembrane              | Purinebiosynthesis           | endoplasmic reticulum membra       |
| LamininEGF-like domain        |                              | Nuclearporecomplex      | DNA damage                | Glycolysis                   | Ribonucleoprotein                  |
| Cleavageonpairofbasicresidues |                              | Bromodomain             | Exosome                   | Protease                     | Ribosome                           |
| Serineproteaseinhibitor       |                              | WDrepeat                | Alternativesplicing       | Pyridoxalphosphate           | mitochondrion                      |
| Calcium                       |                              | Transcription           | DNArepair                 | Proteinbiosynthesis          | mitochondrial membrane             |
| ECM-affiliated Proteins       |                              | Transcriptionregulation | Meiosis                   | Nucleotide-binding           | mitochondrial inner membrane       |
| Sulfation                     |                              | Celljunction            | Palmitate                 | ATP-binding                  | translation                        |
| Keratin                       |                              | Methylation             | GPI-anchor                | Amino-acidbiosynthesis       | membrane                           |
| Growthfactorbinding           |                              | Coiledcoil              | Homeobox                  | Calcium/phospholipid-binding | mitochondrial membrane part        |
| Intermediatefilament          |                              | Myosin                  | mRNAtransport             | Annexin                      | Electrontransport                  |
| Growthfactor                  |                              |                         | DNArecombination          | Tricarboxylicacidcycle       | organelle inner membrane           |
| Heparin-binding               |                              |                         | Helicase                  | Kinase                       | Respiratorychain                   |

**Figure EV1. Efficient separation of subcellular and tissue compartments using QDSP.**

A Non-supervised hierarchical clustering of z-scored MS intensities from the indicated protein fractions and conditions (PBS,  $n = 4$ ; Bleo day 14,  $n = 4$ ). The left panel depicts all 6,641 proteins, while the right panel shows a zoom in on the 435 most detergent-insoluble proteins in cluster A. The row annotation bar assigns proteins into the indicated matrisome categories.

B The table shows UniProt keywords categories that were significantly enriched ( $FDR < 2\%$ ) in the indicated protein clusters of the clustering analysis in (A).

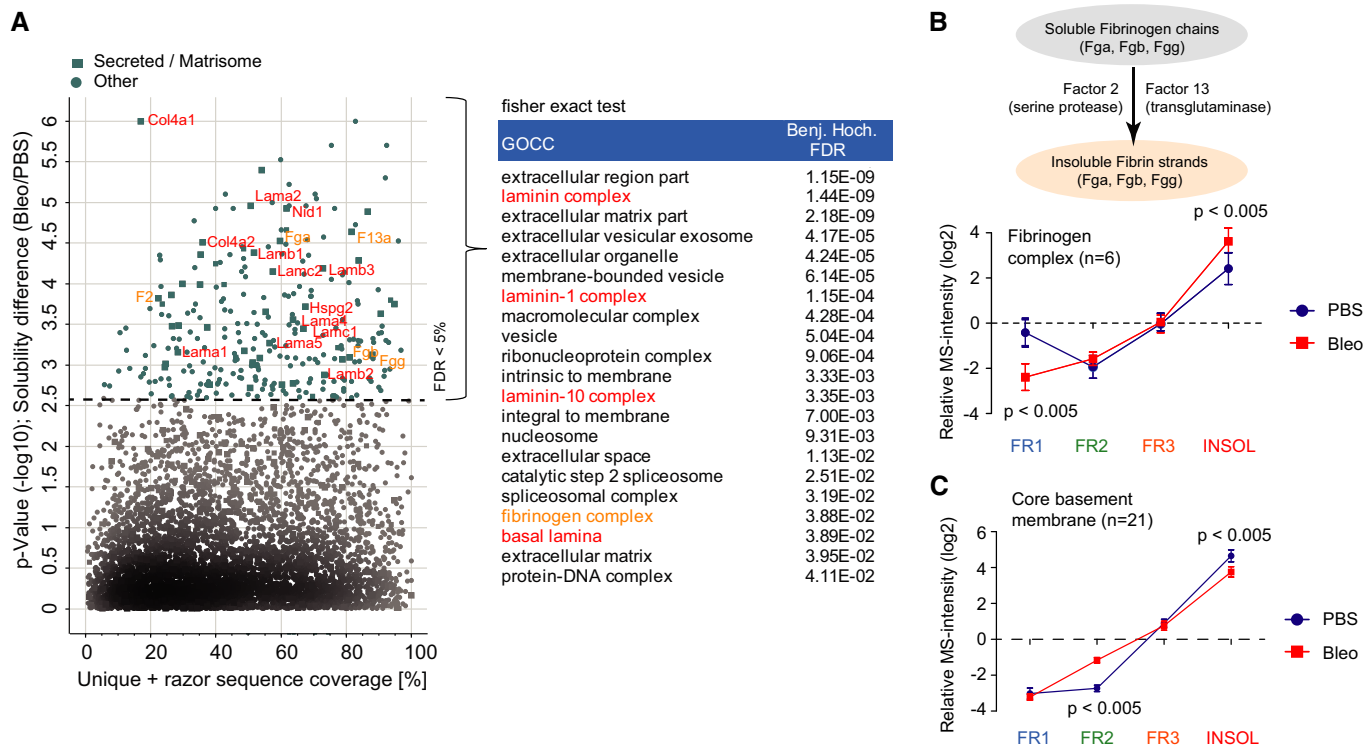

**Figure EV2. Differential solubility of matrisome complexes in tissue fibrogenesis.**

**A** Proteins ( $n = 283$ ) with significantly altered normalized MS intensity profiles (Benjamini–Hochberg  $FDR < 0.05$ ) between PBS controls ( $n = 4$ ) and bleomycin-treated (day 14;  $n = 4$ ) samples are highlighted in a scatter plot depicting the percent coverage of identified tryptic peptides across the protein sequence and the  $P$ -value of the solubility difference. Significantly enriched GOCC terms (Fisher’s exact test,  $FDR < 2\%$ ) in the 283 protein group with altered QDSP profiles are shown in the right panel.

**B, C** The mean normalized QDSP MS intensity profiles of the fibrinogen complex (**B**;  $n = 6$ ) and all core basement membrane proteins (**C**;  $n = 21$ ) from PBS controls ( $n = 4$ ) and bleomycin (day 14;  $n = 4$ ) in red are shown. The mean is shown and the error bars depict the standard error of the mean. The indicated  $P$ -values are derived from a  $t$ -test.

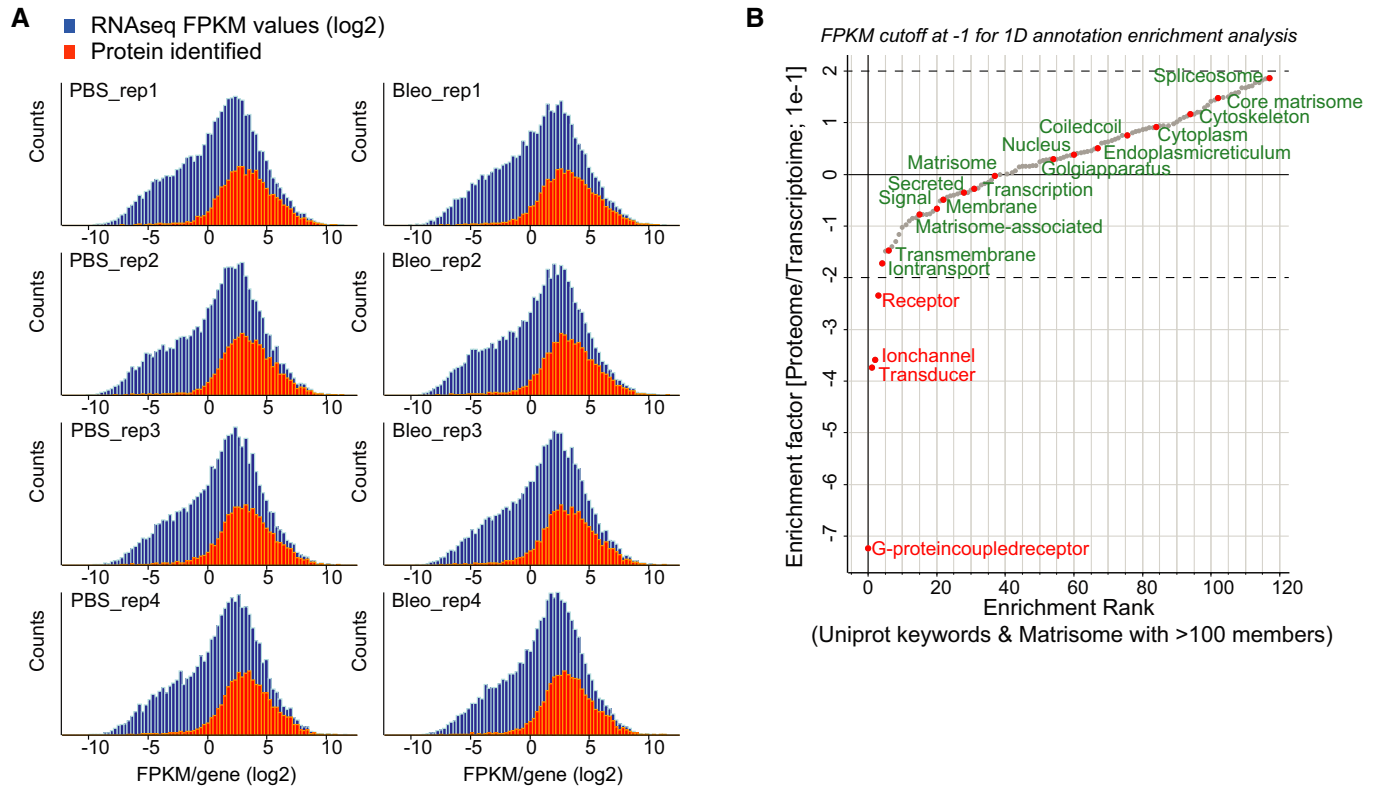

**Figure EV3. Combined proteomic and transcriptomic analyses of tissue fibrogenesis.**

A The histogram shows the distribution of the FPKM values from the RNA-seq experiment in log<sub>2</sub> space (blue bars). The orange bars show the distribution of FPKM values for a total of 6,672 genes for which we also quantified the corresponding protein.

B Relative enrichment (coverage) of the indicated gene categories (UniProt keywords) in the proteome and transcriptome was calculated using the 1D annotation enrichment algorithm embedded in the Perseus software suite. The enrichment is normalized to a score spanning from -1 to 1 as indicated. Gene categories are ranked according to their relative enrichment in the transcriptome or proteome (PBS,  $n = 4$ ; Bleo day 14,  $n = 4$ ).



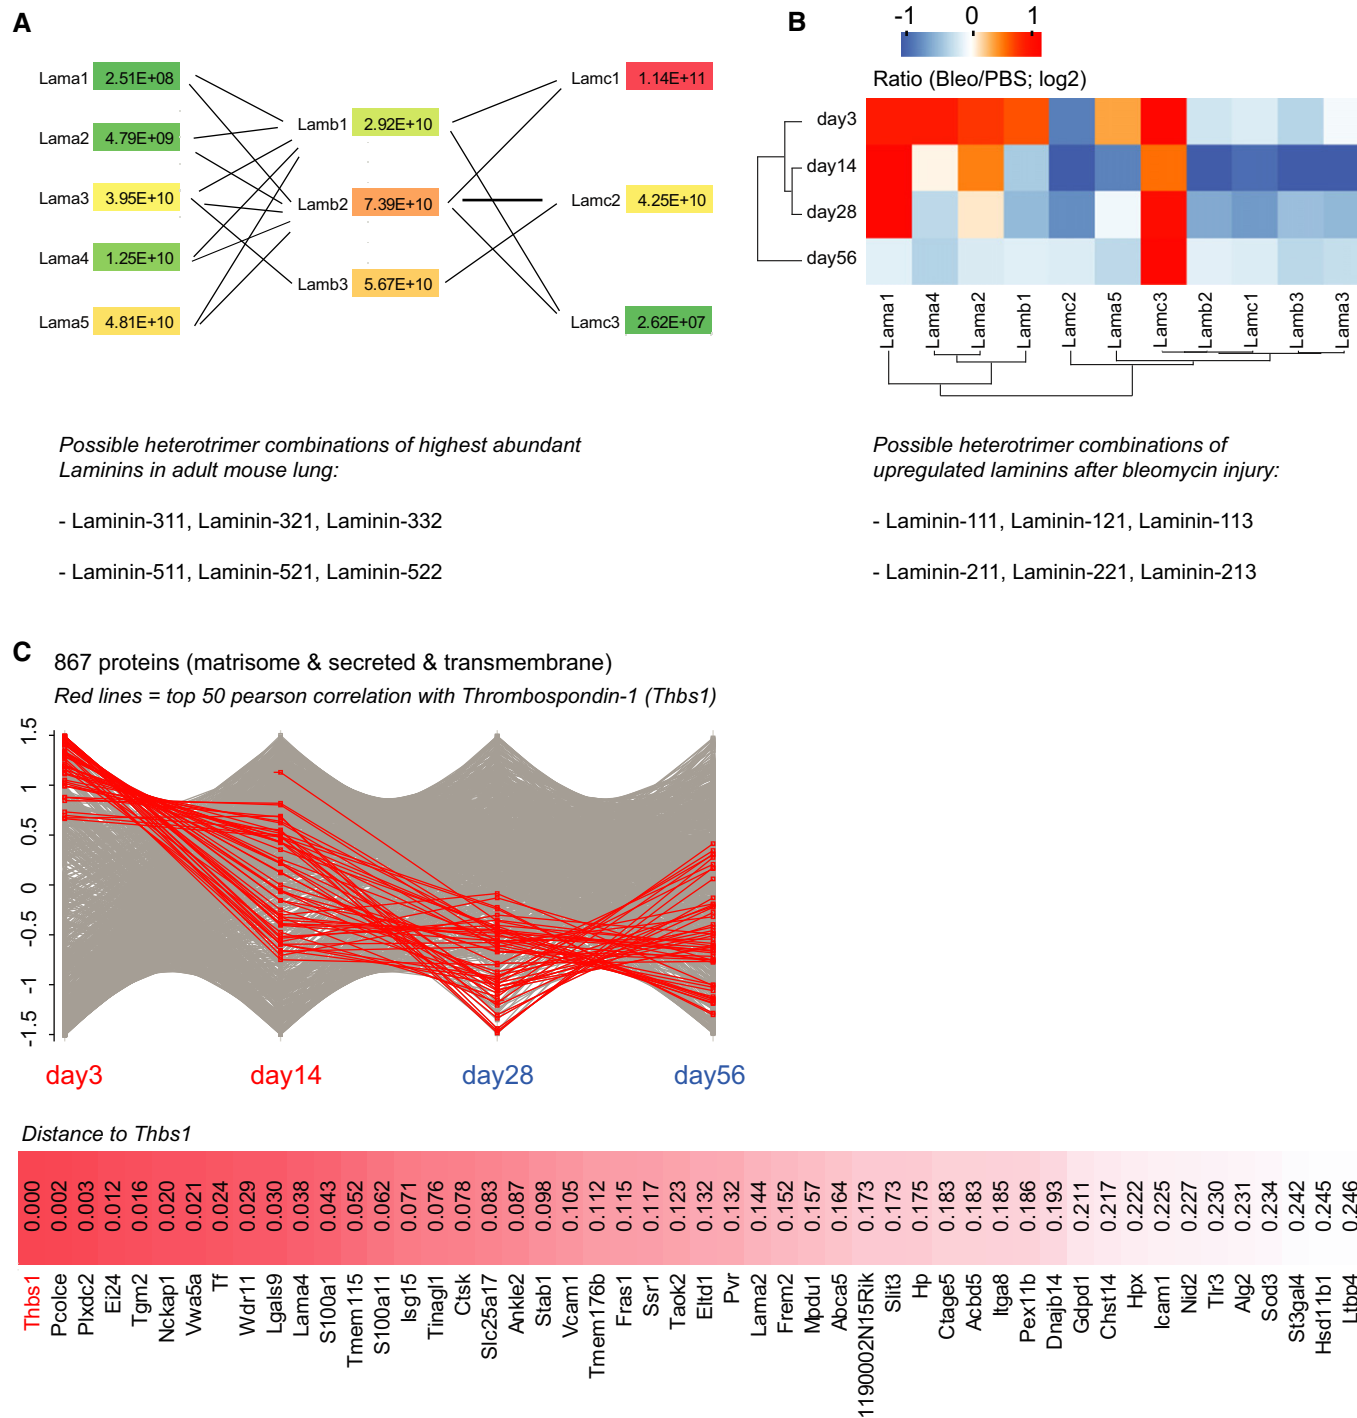

**Figure EV5. Pulmonary basement membrane laminins and immediate early extracellular niche factors upon injury.**

A The median MS intensity of all laminin chains was normalized for the theoretical number of tryptic peptides (iBAQ), yielding a relative stoichiometry of laminin chains, which is shown in the network graph for healthy control lungs (PBS,  $n = 16$ ). The lower panel depicts the possible laminin heterotrimer combinations of the highly abundant  $\alpha 3$ - and  $\alpha 5$ -laminins, based on previous literature.

B The median z-scored MS intensity ratios of the indicated laminin chains were grouped by correlation using unsupervised hierarchical clustering (day 3,  $n = 3$ ; day 14,  $n = 7$ ; day 28,  $n = 4$ ; day 56,  $n = 3$ ). Possible heterotrimer combinations of the upregulated  $\alpha 1$ - and  $\alpha 2$ -laminins are shown in the lower panel.

C The median z-scored MS intensity ratios of 867 extracellular proteins were grouped by correlation analysis of their temporal profiles. The 50 proteins with highest correlation to thrombospondin-1 (Thbs1) are shown (day 3,  $n = 3$ ; day 14,  $n = 7$ ; day 28,  $n = 4$ ; day 56,  $n = 3$ ).

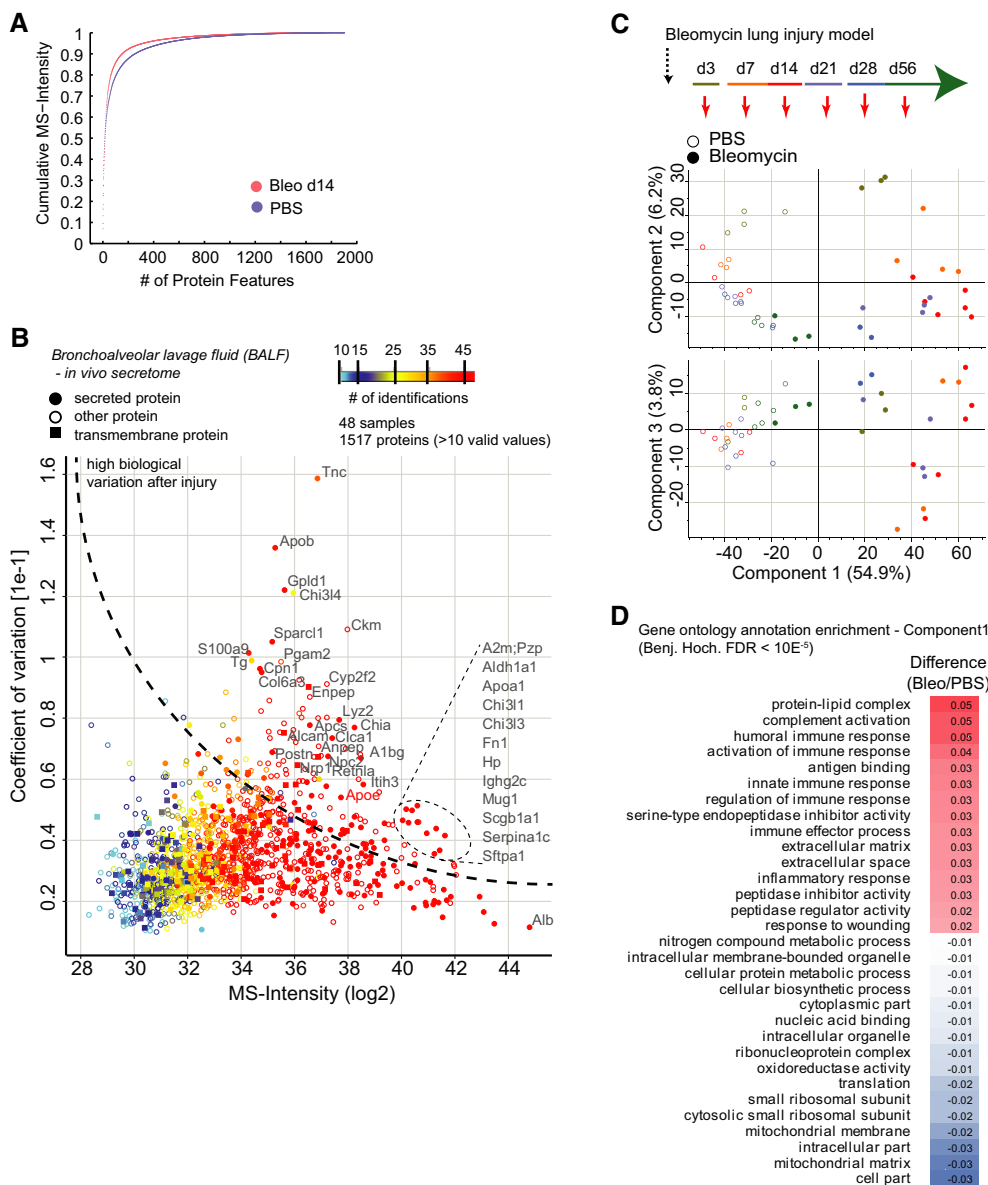

**Figure EV6. Proteomic analysis of bronchoalveolar lavage fluid upon bleomycin injury.**

- A The mean cumulative MS intensity of the indicated conditions demonstrates differences in dynamic range of protein copy numbers (PBS,  $n = 24$ ; Bleo day 14,  $n = 7$ ). The lower number after bleomycin treatment was likely due to the leakage of plasma through the endothelial barrier upon injury, which makes MS analysis more challenging.
- B The scatter plot depicts the median MS intensity versus the coefficient of variation across the injury time course and all replicates, which highlights proteins with high biological variation upon injury. The number of protein identifications across replicates and time points ( $n = 48$ ) is color-coded, and secreted and transmembrane proteins are marked with the indicated symbols.
- C Principal component analysis of BALF proteomes from the indicated experimental conditions and time points separates experimental groups.
- D The table shows significantly regulated gene ontology terms (FDR < 2%) that were found to be enriched in either the negative (PBS) or positive (Bleo) data dimension of component 1 in the principal component analysis shown in (C).
